# Supplementary material for: Toll‐Like Receptor 9 Plays a Pivotal Role in Angiotensin II–Induced Atherosclerosis
Source: PubMed Central journal article supplement — J Am Heart Assoc. 2019 Mar 23;8(7):e010860. doi: 10.1161/JAHA.118.010860 (PMC6509720; doi:10.1161/jaha.118.010860), 2019-03-23
Supplement: JAH3-8-e010860-s001.pdf [file JAH3-8-e010860-s001.pdf]

# **Supplemental Material**

**Table S1. Primer sequences.**

|                | Forward                       | Reverse                       |
|----------------|-------------------------------|-------------------------------|
| F4/80          | 5'- TGCATCTAGCAATGGACAGC -3'  | 5'- GCCTTCTGGATCCATTTGAA -3'  |
| ICAM-1         | 5'- TTCACACTGAATGCCAGCTC -3'  | 5'- GTCTGCTGAGACCCCTCTTG -3'  |
| MCP-1          | 5'-CCACTCACCTGCTGCTACTCAT-3'  | 5'-TGGTGATCCTCTTGTAGCTCTCC-3' |
| TLR9           | 5'-ATGGACGGGAACTGCTACTACA-3'  | 5'-GACCTTGAACCAGGAAGAGTT-3'   |
| TNF- $\alpha$  | 5'-ACCCTCACACTCAGATCATCTTC-3' | 5'-TGGTGGTTTGCTACGACGT-3'     |
| VCAM-1         | 5'-GCCCATCCTCTGTGACTCAT-3'    | 5'-AGGCCACAGGTATTTTGTCTG-3'   |
| $\beta$ -actin | 5'-CCTGAGCGCAAGTACTCTGTGT-3'  | 5'-GCTGATCCACATCTGCTGGAA-3'   |

**Table S2. Effect of genetic deletion of TLR9 on metabolic parameters in vehicle infused mice.**

|                                | <i>Apoe</i> <sup>-/-</sup> | <i>Tlr9</i> <sup>-/-</sup> <i>Apoe</i> <sup>-/-</sup> | <i>P</i> -value |
|--------------------------------|----------------------------|-------------------------------------------------------|-----------------|
| Body weight, g                 | 31.7±0.8                   | 31.8±1.1                                              | 0.72            |
| Heart rate, bpm                | 750±5                      | 725±12                                                | 0.05            |
| Systolic blood pressure, mmHg  | 100.6±2.6                  | 98.0±2.2                                              | 0.56            |
| Diastolic blood pressure, mmHg | 64.7±1.9                   | 58.6±2.3                                              | 0.05            |
| Total cholesterol, mg/dl       | 1034.9±80.4                | 1193.1±135.4                                          | 0.29            |
| Triglyceride, mg/dl            | 140.9±10.9                 | 150.0±23.1                                            | 0.71            |
| HDL cholesterol, mg/dl         | 20.6±1.5                   | 20.1±2.4                                              | 0.86            |

All values are mean ± SEM. HDL; high-density lipoprotein

**Figure S1. Effect of genetic deletion of TLR9 on abdominal aortic aneurysm formation and survival curve.**

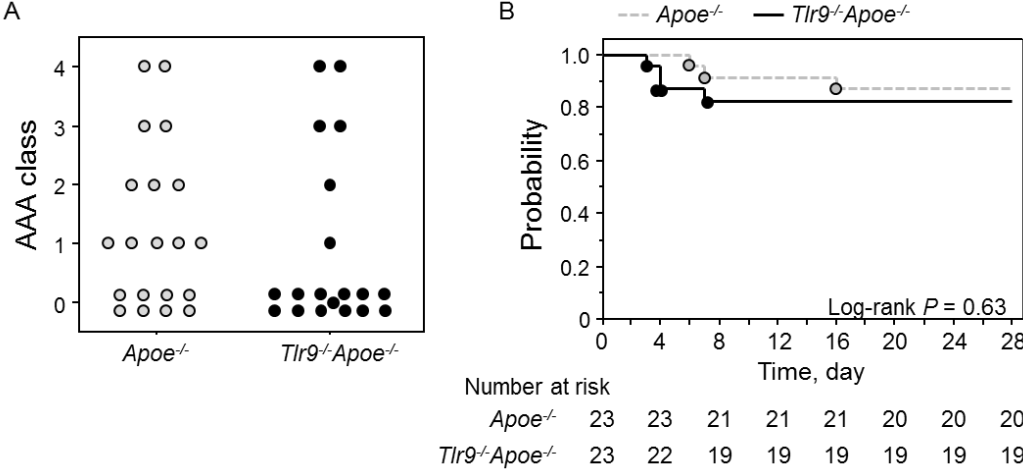

Genetic deletion of TLR9 did not affect the severity of abdominal aortic aneurysm (**A**) and survival curve (**B**) between *Apoe*<sup>-/-</sup> mice and *Tlr9*<sup>-/-</sup>*Apoe*<sup>-/-</sup> mice. The severity of abdominal aortic aneurysm and survival curve between the two strains were analyzed by Mann-Whitney U test and Kaplan-Meier method with log-rank test, respectively.

**Figure S2. iODN2088, a specific antagonist to TLR9, inhibits TLR9 activation.**

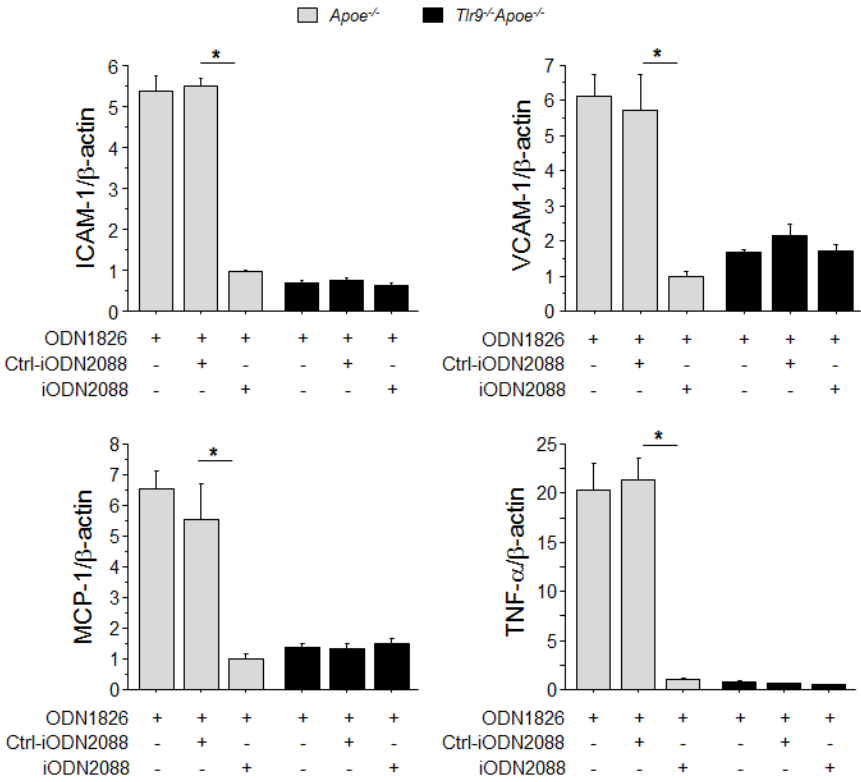

qPCR analysis demonstrated that iODN2088, an inhibitory oligonucleotide for TLR9, blocked inflammatory molecule expression induced by ODN1826. \**P* < 0.05. All comparisons between iODN2088-treated group and Ctrl-iODN-treated group were performed with Mann-Whitney U test. All values are mean  $\pm$  SEM.

**Figure S3. TLR9 ligation promotes p38 MAPK activation in *ApoE*<sup>-/-</sup> macrophages.**

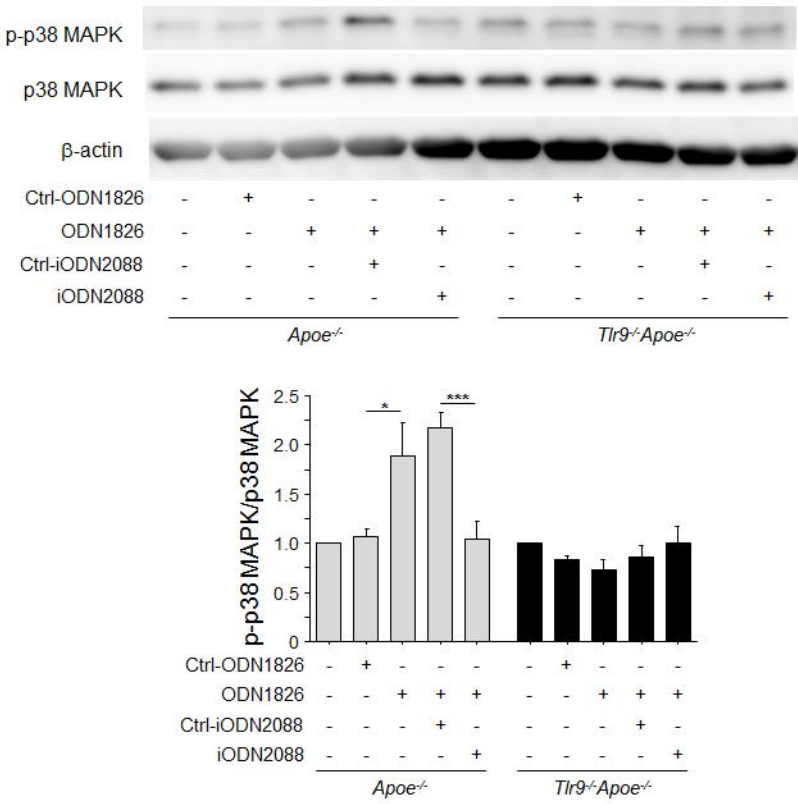

Western blotting analysis showed that ODN1826 increased the phosphorylation of p38 MAPK in *ApoE*<sup>-/-</sup> macrophages, which was blocked in the presence of iODN2088. Both ODN1826 and iODN2088 did not have any effect in *Tlr9*<sup>-/-</sup>*ApoE*<sup>-/-</sup> mice. \**P*<0.05, and \*\*\**P*<0.001. Comparison between ODN1826-treated group and Ctrl-ODN1826-treated group and comparison between iODN2088-treated group and Ctrl-iODN-treated group were performed with Mann-Whitney U test. All values are mean ± SEM.

**Figure S4.** *Tlr9*<sup>-/-</sup>*ApoE*<sup>-/-</sup> mice had larger atherosclerotic lesions compared with *ApoE*<sup>-/-</sup> mice under vehicle infusion condition.

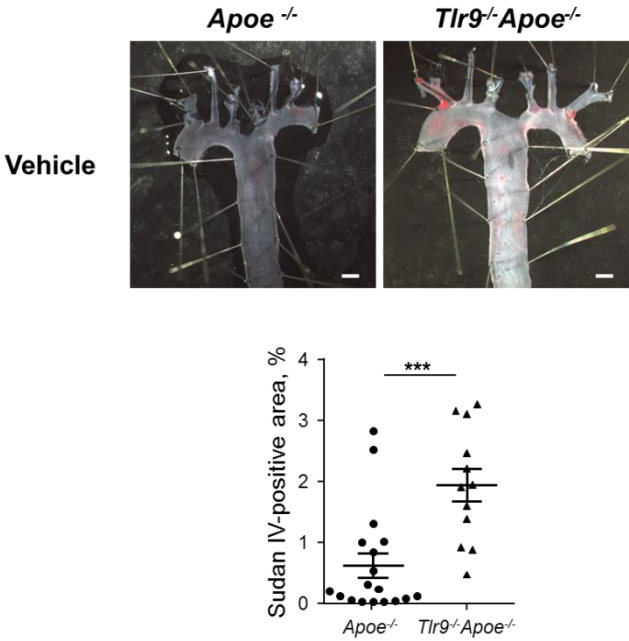

Genetic deletion of TLR9 promoted atherosclerotic lesion development in vehicle-infused *ApoE*<sup>-/-</sup> mice (n = 12-18). Scale bar; 1 mm. \*\*\**P* < 0.001. Comparison between *Tlr9*<sup>-/-</sup>*ApoE*<sup>-/-</sup> mice and *ApoE*<sup>-/-</sup> mice was performed with Mann-Whitney U test. All values are mean ± SEM.
